# Supplementary material
Source: Springer Nature journal article supplement (https://www.springermedizin.de/resource/supplementary/10194_2013_310_MOESM1_ESM.pdf/9422662)

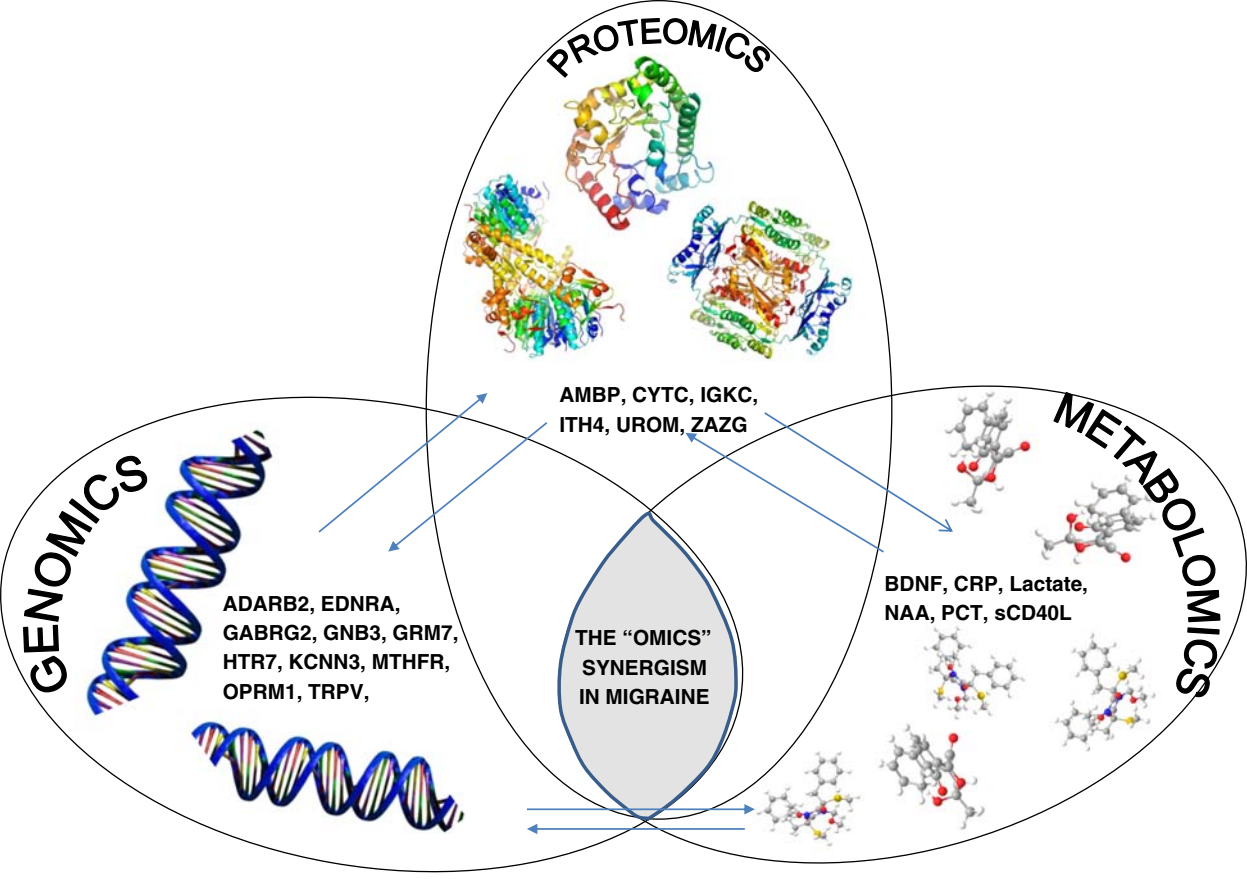

Supplement: MOESM1 [file 9422662]
